# Supplementary material
Source: PubMed Central journal article supplement (PMC113861)
Supplement: nar_30_9_e38__3.pdf [file nar_30_9_e38__3.pdf]

## Additional material

**Table A. The most abundant mRNAs in human skeletal muscle (*pectoralis major*)**

| <i>Symbol</i> <sup>a</sup> | <i>%</i> <sup>b</sup> | <i>Filter</i> <sup>c</sup> | <i>Gene description</i>                                          | <i>Acc.N</i> <sup>d</sup> | <i>Trait ID</i> <sup>e</sup> |
|----------------------------|-----------------------|----------------------------|------------------------------------------------------------------|---------------------------|------------------------------|
| 1 ACTA1                    | [8.54]                | A03                        | actin, alpha 1, skeletal muscle                                  | J00068                    | 54                           |
| 2 HBA1                     | [2.56]                | A04                        | globin, alpha 1                                                  | V00491                    | 804                          |
| 3 MYL2                     | [2.09]                | A05                        | myosin, light polypeptide 2, regulatory, cardiac, slow           | X66141                    | 777                          |
| 4 CKM                      | 1.31                  | A06                        | creatine kinase, muscle                                          | M14780                    | 1335                         |
| 5 TNNT1                    | 1.07                  | A07                        | troponin T1, skeletal, slow                                      | S69208                    | 697                          |
| 6 RPL37A                   | 0.99                  | A08                        | ribosomal protein L37a                                           | L06499                    | 1765                         |
| 7 TPM2                     | 0.85                  | A12                        | tropomyosin 2 (beta)                                             | X06825                    | 1673                         |
| 8 MB                       | 0.84                  | A09                        | myoglobin                                                        | X00371                    | 1333                         |
| 9 GAPD                     | 0.77                  | A10                        | glyceraldehyde-3-phosphate dehydrogenase                         | M33197                    | 1800                         |
| 10 MYH7                    | 0.68                  | A11                        | myosin, heavy polypeptide 7, cardiac muscle, beta                | M57965                    | 37                           |
| 11 TNNT1                   | 0.63                  | B03                        | troponin I, skeletal, slow                                       | J04760                    | 1070                         |
| 12 RPL41                   | 0.53                  | B04                        | ribosomal protein L41                                            | Z12962                    | 1236                         |
| 13 TELE                    | 0.49                  | B06                        | telethonin, 19 kDa sarcomeric protein/titin-cap                  | AJ00049                   | 1284                         |
| 14 TNNC2                   | 0.49                  | C03                        | troponin C2, fast                                                | X07898                    | 1726                         |
| 15 COX6A2                  | 0.47                  | B07                        | cytochrome c oxidase subunit VIa polypeptide 2                   | U66875                    | 1931                         |
| 16 MYL2                    | 0.44                  | B08                        | myosin light chain 2 (clone PWHLC2-24)                           | M21812                    | 603                          |
| 17 HBB                     | 0.43                  | B11                        | globin, beta                                                     | L48932                    | 1495                         |
| 18 DES                     | 0.42                  | B09                        | desmin                                                           | M63391                    | 1585                         |
| 19 RPS25                   | 0.41                  | B12                        | ribosomal protein S25                                            | M64716                    | 1305                         |
| 20 MYL3                    | 0.39                  | B05                        | myosin, light polypeptide 3, alkali; ventricular, skeletal, slow | M24122                    | 75                           |
| 21 TNNT2                   | 0.38                  | C04                        | troponin I, skeletal, fast                                       | L21715                    | 1057                         |
| 22 RPL37                   | 0.37                  | C05                        | ribosomal protein L37                                            | D23661                    | 1664                         |
| 23 COX7A1                  | 0.31                  | C08                        | cytochrome c oxidase subunit VIIa polypeptide 1 (muscle)         | AF03737                   | 1312                         |
| 24 ALDOA                   | 0.28                  | C06                        | aldolase A, fructose-bisphosphate                                | M11560                    | 1752                         |
| 25 CRYAB                   | 0.28                  | D04                        | crystallin, alpha B                                              | S45630                    | 78                           |
| 26 RPLP1                   | 0.27                  | C07                        | ribosomal protein, large, P1                                     | M17886                    | 1646                         |
| 27 FHL1                    | 0.25                  | D06                        | four and a half LIM domains 1                                    | U60115                    | 1885                         |
| 28 MYH2                    | 0.25                  | C09                        | myosin, heavy polypeptide 2, skeletal muscle, adult              | S73840                    | 38                           |
| 29 TPM1                    | 0.24                  | C11                        | tropomyosin 1 (alpha)                                            | M19713                    | 900                          |
| 30 ENO3                    | 0.23                  | D03                        | beta enolase, muscle                                             | X56832                    | 1332                         |
| 31 RPL31                   | 0.23                  | D05                        | ribosomal protein L31                                            | X15940                    | 1760                         |
| 32 TNNC1                   | 0.23                  | B10                        | troponin C, slow                                                 | M37984                    | 1337                         |
| 33 LOC5454                 | 0.22                  | E03                        | 6.2 kd protein                                                   | AJ01100                   | 1302                         |
| 34 MYOZ                    | 0.22                  | D08                        | FATZ/myozenin                                                    | AJ27812                   | 1883                         |
| 35 HSPB1                   | 0.22                  | C12                        | heat shock 27kd protein 1                                        | U90906                    | 826                          |
| 36 -----                   | 0.22                  | D12                        | myosin light chain 3 (MLC-3f)                                    | X05451                    | 1518                         |
| 37 RPL10                   | 0.21                  | D07                        | ribosomal protein L10                                            | M64241                    | 502                          |
| 38 RPLP2                   | 0.2                   | D11                        | ribosomal protein, large P2                                      | M17887                    | 1944                         |
| 39 NTRK1                   | 0.2                   | E05                        | tropomyosin (1.3 kb mRNA)                                        | X04201                    | 1085                         |
| 40 TPT1                    | 0.2                   | E09                        | tumor protein, translationally-controlled 1                      | X16064                    | 1348                         |
| 41 COX7C                   | 0.19                  | D10                        | cytochrome c oxidase subunit VIIc                                | X16560                    | 121                          |
| 42 UBA52                   | 0.19                  | E07                        | ubiquitin A-52 residue ribosomal protein fusion product 1        | X56999                    | 1356                         |
| 43 -----                   | 0.18                  | E06                        | PROVISIONAL: cDNA FLJ22805 fis, clone KAIA2821                   | AK02645                   | 756                          |
| 44 TNNT3                   | 0.18                  | D09                        | troponin T3, skeletal, fast                                      | M21984                    | 685                          |
| 45 RPL32                   | 0.17                  | E08                        | ribosomal protein L32                                            | X03342                    | 1573                         |
| 46 RPS11                   | 0.17                  | E04                        | ribosomal protein S11                                            | X06617                    | 1735                         |
| 47 RPS20                   | 0.17                  |                            | ribosomal protein S20                                            | L06498                    | 258                          |
| 48 TTN                     | 0.17                  |                            | titin                                                            | X69490                    | 1593                         |
| 49 PYGM                    | 0.15                  | E10                        | glycogen phosphorylase, muscle (McArdle syndrome)                | U94777                    | 1480                         |
| 50 MYBPC1                  | 0.15                  | C10                        | myosin-binding protein C, slow-type                              | X73114                    | 1574                         |

Only nuclear-encoded mRNAs are shown (Mitochondrial transcripts are listed in Table B)

<sup>a</sup>Official Gene Symbol. <sup>b</sup>Relative abundance, estimated after analysis of about 37,000 independent cDNA clones (Materials and Methods); number between square brackets refers to frequencies calculated from the first thousand ESTs of the HM1 library (Ref. 13). <sup>c</sup>Position on the nylon filters used for pre-screening tests (Figure 1 and Table C). <sup>d</sup>GenBank accession number. <sup>e</sup>Entry at Muscle TRAIT database (<http://muscle.cribi.unipd.it>).

A more comprehensive table is available at our WEB site.
