# Supplementary material
Source: PubMed Central journal article supplement (PMC113861)
Supplement: nar_30_9_e38__4.pdf [file nar_30_9_e38__4.pdf]

**Table B. Mitochondrial transcripts**

| <i>RNA</i> <sup>a</sup> | <i>Gene product</i>               | <i>RefSeq</i> <sup>b</sup> | <i>Frequencies</i> <sup>c</sup> |                    |
|-------------------------|-----------------------------------|----------------------------|---------------------------------|--------------------|
|                         |                                   |                            | HM3                             | HM3/S <sup>3</sup> |
| 12S                     | ribosomal RNA, small subunit      | 648 - 1601                 | 0.3                             | 0.0                |
| 16S                     | ribosomal RNA, large subunit      | 1671 - 3229                | 4.2                             | 0.3                |
| RNA 13                  | NADH dehydrogenase, subunit 1     | 3305 - 4262                | 3.0                             | 0.0                |
| RNA 12                  | NADH dehydrogenase, subunit 2     | 4470 - 5511                | n.d.                            | 0.0                |
| RNA 9                   | cytochrome c oxidase, subunit 1   | 5901 - 7517                | 1.0                             | 0.1                |
| RNA 16                  | cytochrome c oxidase, subunit 2   | 7586 - 8294                | n.d.                            | 0.0                |
| RNA 14                  | ATPase, subunits 6-8              | 8365 - 9206                | n.d.                            | 0.1                |
| RNA 15                  | cytochrome c oxidase, subunit 3   | 9207 - 9990                | n.d.                            | 0.0                |
| RNA 17                  | NADH dehydrogenase, subunit 3     | 10059 - 10404              | n.d.                            | 0.0                |
| RNA 7                   | NADH dehydrogenase, subunits 4L-4 | 10470 - 12137              | 3.2                             | 0.0                |
| RNA 5                   | NADH dehydrogenase, subunit 5     | 12337 - 14148 <sup>d</sup> | 0.1                             | 0.0                |
| RNA 11                  | cytochrome b                      | 14747 - 15887              | 1.5                             | 0.2                |

<sup>a</sup>RNA molecules, nomenclature after GenBank sequence J01415. <sup>b</sup>Position in the mitochondrial genome, RefSeq accession no. NC\_001807. <sup>c</sup>Frequencies of cDNA clones identifying mitochondrial genes respectively in the HM3 library (not subtracted) and in the subtracted HM3/S<sup>3</sup> library. n.d. = Not determined in the HM3 library; the frequencies in the HM1 library are reported elsewhere (Ref. 13). Note that the ESTs of five transcripts were systematically excluded from DNA sequencing through semi-multiplexed interference PCR (Ref. 23). <sup>d</sup>The most 3' terminal ESTs showed in Figure 3 end instead at position 14746.
