# Supplementary material
Source: PubMed Central journal article supplement (PMC113861)
Supplement: nar_30_9_e38__5.pdf [file nar_30_9_e38__5.pdf]

## Additional material

**Table C. Filter hybridization and sequencing results**

| <i>Filter</i> | <i>Trait</i> | <i>Symbol</i> | HM3           |                   | HM3/RH               |             | HM3/S <sup>3</sup> |             |
|---------------|--------------|---------------|---------------|-------------------|----------------------|-------------|--------------------|-------------|
|               |              |               | <i>Im</i>     | <i>ESTs</i>       | <i>Im</i>            | <i>ESTs</i> | <i>Im</i>          | <i>ESTs</i> |
| A03           | 54           | ACTA1         | 0.650 ± 0.021 | n.d. <sup>a</sup> | <u>0.093 ± 0.004</u> | -           | 0.048 ± 0.006      | 1           |
| A04           | 804          | HBA1          | 0.142 ± 0.013 | n.d. <sup>a</sup> | <u>0.014 ± 0.001</u> | -           | 0.007 ± 0.000      | 0           |
| A05           | 777          | MYL2          | 0.419 ± 0.038 | n.d. <sup>a</sup> | <u>0.065 ± 0.003</u> | -           | 0.013 ± 0.000      | 1           |
| A06           | 1335         | CKM           | 0.325 ± 0.039 | 24                | <u>0.076 ± 0.007</u> | -           | 0.019 ± 0.002      | 1           |
| A07           | 697          | TNNT1         | 0.114 ± 0.015 | 24                | <u>0.011 ± 0.000</u> | -           | 0.007 ± 0.000      | 0           |
| A08           | 1765         | RPL37A        | 0.165 ± 0.021 | 10                | 0.259 ± 0.040        | -           | 0.196 ± 0.017      | 2           |
| A09           | 1333         | MB            | 0.182 ± 0.014 | 11                | 0.332 ± 0.017        | -           | 0.827 ± 0.064      | 16          |
| A10           | 1800         | GAPD          | 0.130 ± 0.020 | 9                 | <u>0.017 ± 0.001</u> | -           | 0.014 ± 0.001      | 0           |
| A11           | 37           | MYH7          | 0.296 ± 0.066 | 13                | <u>0.059 ± 0.002</u> | -           | 0.018 ± 0.001      | 0           |
| A12           | 1673         | TPM2          | 0.152 ± 0.025 | 16                | <u>0.081 ± 0.005</u> | -           | 0.012 ± 0.002      | 1           |
| B03           | 1070         | TNNI1         | 0.207 ± 0.007 | 7                 | <u>0.171 ± 0.002</u> | -           | 0.048 ± 0.003      | 1           |
| B04           | 1236         | RPL41         | 0.128 ± 0.003 | 1                 | 0.166 ± 0.007        | -           | 0.451 ± 0.046      | 2           |
| B05           | 75           | MYL3          | 0.075 ± 0.010 | 3                 | 0.249 ± 0.013        | -           | 0.080 ± 0.006      | 2           |
| B06           | 1284         | TELE          | 0.113 ± 0.011 | 7                 | 0.038 ± 0.001        | -           | 0.012 ± 0.001      | 2           |
| B07           | 1931         | COX6A2        | 0.104 ± 0.014 | 5                 | 0.085 ± 0.006        | -           | 0.045 ± 0.002      | 0           |
| B08           | 603          | MYL2          | 0.101 ± 0.010 | 2                 | 0.275 ± 0.028        | -           | 0.023 ± 0.001      | 0           |
| B09           | 1585         | DES           | 0.245 ± 0.035 | 12                | 0.083 ± 0.008        | -           | 0.099 ± 0.005      | 4           |
| B10           | 1337         | TNNC1         | 0.046 ± 0.004 | 0                 | 0.031 ± 0.004        | -           | 0.016 ± 0.001      | 2           |
| B11           | 1495         | HBB           | 0.038 ± 0.005 | 6                 | 0.115 ± 0.002        | -           | 0.015 ± 0.002      | 2           |
| C03           | 1726         | TNNC2         | 0.085 ± 0.007 | 3                 | 0.040 ± 0.001        | -           | 0.014 ± 0.000      | 0           |
| C04           | 1057         | TNNI2         | 0.099 ± 0.011 | 10                | 0.129 ± 0.016        | -           | 0.065 ± 0.002      | 2           |
| C05           | 1664         | RPL37         | 0.088 ± 0.004 | 3                 | 0.134 ± 0.012        | -           | 0.565 ± 0.057      | 24          |
| C06           | 1752         | ALDOA         | 0.112 ± 0.021 | 6                 | 0.109 ± 0.004        | -           | 0.127 ± 0.020      | 13          |
| C07           | 1646         | RPLP1         | 0.065 ± 0.009 | 4                 | 0.042 ± 0.004        | -           | 0.012 ± 0.001      | 3           |
| C08           | 1312         | COX7A1        | 0.067 ± 0.008 | 2                 | 0.134 ± 0.003        | -           | 0.115 ± 0.005      | 7           |
| C09           | 38           | MYH2          | 0.231 ± 0.039 | 1                 | 0.174 ± 0.021        | -           | 0.037 ± 0.001      | 1           |
| C10           | 1574         | MYBPC1        | 0.025 ± 0.002 | 5                 | 0.019 ± 0.002        | -           | 0.029 ± 0.002      | 1           |
| C11           | 900          | TPM1          | 0.061 ± 0.012 | 3                 | 0.110 ± 0.001        | -           | 0.124 ± 0.008      | 2           |
| C12           | 826          | HSPB1         | 0.079 ± 0.006 | 3                 | 0.107 ± 0.005        | -           | 0.074 ± 0.001      | 2           |
| D03           | 1332         | ENO3          | 0.041 ± 0.004 | 4                 | 0.067 ± 0.001        | -           | 0.229 ± 0.007      | 10          |
| D04           | 78           | CRYAB         | 0.035 ± 0.002 | 1                 | 0.023 ± 0.002        | -           | 0.067 ± 0.003      | 0           |
| D07           | 502          | RPL10         | 0.063 ± 0.013 | 2                 | 0.100 ± 0.011        | -           | 0.165 ± 0.009      | 1           |
| D08           | 1883         | MYOZ          | 0.061 ± 0.009 | 3                 | 0.063 ± 0.008        | -           | 0.055 ± 0.007      | 0           |
| D09           | 685          | TNNT3         | 0.037 ± 0.005 | 8                 | 0.048 ± 0.003        | -           | 0.009 ± 0.001      | 0           |
| D11           | 1944         | RPLP2         | 0.031 ± 0.006 | 1                 | 0.028 ± 0.001        | -           | 0.008 ± 0.000      | 0           |
| D12           | 1518         | -----         | 0.021 ± 0.004 | 0                 | 0.018 ± 0.002        | -           | 0.009 ± 0.001      | 0           |
| E04           | 1735         | RPS11         | 0.067 ± 0.005 | 0                 | 0.040 ± 0.003        | -           | 0.029 ± 0.002      | 3           |
| E05           | 1085         | NTRK1         | 0.048 ± 0.006 | 0                 | 0.044 ± 0.001        | -           | 0.012 ± 0.001      | 2           |
| E06           | 756          | -----         | 0.101 ± 0.011 | 0                 | 0.021 ± 0.001        | -           | 0.019 ± 0.005      | 0           |
| E07           | 1356         | UBA52         | 0.071 ± 0.016 | 3                 | 0.061 ± 0.003        | -           | 0.022 ± 0.001      | 2           |
| E08           | 1573         | RPL32         | 0.035 ± 0.005 | 0                 | 0.042 ± 0.001        | -           | 0.271 ± 0.011      | 5           |
| E09           | 1348         | TPT1          | 0.018 ± 0.003 | 6                 | 0.013 ± 0.001        | -           | 0.023 ± 0.002      | 0           |
| E10           | 1480         | PYGM          | 0.068 ± 0.012 | 2                 | 0.073 ± 0.002        | -           | 0.110 ± 0.006      | 0           |
| E12           | 168          | RPS17         | 0.080 ± 0.013 | 3                 | 0.033 ± 0.002        | -           | 0.012 ± 0.001      | 0           |

Transcripts are identifiable by the first three columns (cfr. Table A). **Im**: mean ± standard deviation of the normalized signal intensities, calculated for each of the four replica spots on the filters. Data relative to the transcripts target of oligo-directed RNase H digestion in the HM3/RH library are boxed. **ESTs**: number of ESTs identifying each transcript in the sample of 1,000 sequences examined. <sup>a</sup>Not determined by sequencing; however the frequencies estimated by pre-screening tests were close to the values reported in Table A.
