# Supplementary material
Source: PubMed Central journal article supplement (PMC113861)
Supplement: nar_30_9_e38__7.pdf [file nar_30_9_e38__7.pdf]

| Filter | HM3           | HM3/RH        | HM3/S3        |
|--------|---------------|---------------|---------------|
| A01    | 0.123 ± 0.007 | 0.345 ± 0.049 | 0.026 ± 0.000 |
| A02    | 0.407 ± 0.021 | 0.704 ± 0.028 | 0.046 ± 0.001 |
| A03    | 0.650 ± 0.021 | 0.093 ± 0.004 | 0.048 ± 0.006 |
| A04    | 0.142 ± 0.013 | 0.014 ± 0.001 | 0.007 ± 0.000 |
| A05    | 0.419 ± 0.038 | 0.065 ± 0.003 | 0.013 ± 0.000 |
| A06    | 0.325 ± 0.039 | 0.076 ± 0.007 | 0.019 ± 0.002 |
| A07    | 0.114 ± 0.015 | 0.011 ± 0.000 | 0.007 ± 0.000 |
| A08    | 0.165 ± 0.021 | 0.259 ± 0.040 | 0.196 ± 0.017 |
| A09    | 0.182 ± 0.014 | 0.332 ± 0.017 | 0.827 ± 0.064 |
| A10    | 0.130 ± 0.020 | 0.017 ± 0.001 | 0.014 ± 0.001 |
| A11    | 0.296 ± 0.066 | 0.059 ± 0.002 | 0.018 ± 0.001 |
| A12    | 0.152 ± 0.025 | 0.081 ± 0.005 | 0.012 ± 0.002 |
| B01    | 0.859 ± 0.013 | 0.144 ± 0.004 | 0.020 ± 0.002 |
| B02    | 0.288 ± 0.022 | 0.071 ± 0.002 | 0.020 ± 0.003 |
| B03    | 0.207 ± 0.007 | 0.171 ± 0.002 | 0.048 ± 0.003 |
| B04    | 0.128 ± 0.003 | 0.166 ± 0.007 | 0.451 ± 0.046 |
| B05    | 0.075 ± 0.010 | 0.249 ± 0.013 | 0.080 ± 0.006 |
| B06    | 0.113 ± 0.011 | 0.038 ± 0.001 | 0.012 ± 0.001 |
| B07    | 0.104 ± 0.014 | 0.085 ± 0.006 | 0.045 ± 0.002 |
| B08    | 0.101 ± 0.010 | 0.275 ± 0.028 | 0.023 ± 0.001 |
| B09    | 0.245 ± 0.035 | 0.083 ± 0.008 | 0.099 ± 0.005 |
| B10    | 0.046 ± 0.004 | 0.031 ± 0.004 | 0.016 ± 0.001 |
| B11    | 0.038 ± 0.005 | 0.115 ± 0.002 | 0.015 ± 0.002 |
| B12    | 0.021 ± 0.002 | 0.027 ± 0.001 | 0.041 ± 0.003 |
| C01    | 0.126 ± 0.015 | 0.020 ± 0.001 | 0.009 ± 0.001 |
| C02    | 0.034 ± 0.002 | 0.026 ± 0.001 | 0.007 ± 0.001 |
| C03    | 0.085 ± 0.007 | 0.040 ± 0.001 | 0.014 ± 0.000 |
| C04    | 0.099 ± 0.011 | 0.129 ± 0.016 | 0.065 ± 0.002 |
| C05    | 0.088 ± 0.004 | 0.134 ± 0.012 | 0.565 ± 0.057 |
| C06    | 0.112 ± 0.021 | 0.109 ± 0.004 | 0.127 ± 0.020 |
| C07    | 0.065 ± 0.009 | 0.042 ± 0.004 | 0.012 ± 0.001 |
| C08    | 0.067 ± 0.008 | 0.134 ± 0.003 | 0.115 ± 0.005 |
| C09    | 0.231 ± 0.039 | 0.174 ± 0.021 | 0.037 ± 0.001 |
| C10    | 0.025 ± 0.002 | 0.019 ± 0.002 | 0.029 ± 0.002 |
| C11    | 0.061 ± 0.012 | 0.110 ± 0.001 | 0.124 ± 0.008 |
| C12    | 0.079 ± 0.006 | 0.107 ± 0.005 | 0.074 ± 0.001 |
| D01    | 0.363 ± 0.024 | 0.449 ± 0.049 | 0.067 ± 0.002 |
| D02    | 0.894 ± 0.092 | 0.068 ± 0.004 | 0.017 ± 0.000 |
| D03    | 0.041 ± 0.004 | 0.067 ± 0.001 | 0.229 ± 0.007 |
| D04    | 0.035 ± 0.002 | 0.023 ± 0.002 | 0.067 ± 0.003 |
| D05    | 0.045 ± 0.006 | 0.026 ± 0.001 | 0.009 ± 0.001 |
| D06    | 0.023 ± 0.003 | 0.005 ± 0.000 | 0.006 ± 0.000 |
| D07    | 0.063 ± 0.013 | 0.100 ± 0.011 | 0.165 ± 0.009 |
| D08    | 0.061 ± 0.009 | 0.063 ± 0.008 | 0.055 ± 0.007 |
| D09    | 0.037 ± 0.005 | 0.048 ± 0.003 | 0.009 ± 0.001 |
| D10    | 0.058 ± 0.015 | 0.038 ± 0.002 | 0.019 ± 0.002 |
| D11    | 0.031 ± 0.006 | 0.028 ± 0.001 | 0.008 ± 0.000 |
| D12    | 0.021 ± 0.004 | 0.018 ± 0.002 | 0.009 ± 0.001 |
| E01    | 0.018 ± 0.004 | 0.008 ± 0.000 | 0.007 ± 0.001 |
| E02    | 0.179 ± 0.015 | 0.066 ± 0.006 | 0.009 ± 0.001 |
| E03    | 0.022 ± 0.001 | 0.005 ± 0.000 | 0.006 ± 0.000 |
| E04    | 0.067 ± 0.005 | 0.040 ± 0.003 | 0.029 ± 0.002 |
| E05    | 0.048 ± 0.006 | 0.044 ± 0.001 | 0.012 ± 0.001 |
| E06    | 0.101 ± 0.011 | 0.021 ± 0.001 | 0.019 ± 0.005 |
| E07    | 0.071 ± 0.016 | 0.061 ± 0.003 | 0.022 ± 0.001 |
| E08    | 0.035 ± 0.005 | 0.042 ± 0.001 | 0.271 ± 0.011 |
| E09    | 0.018 ± 0.003 | 0.013 ± 0.001 | 0.023 ± 0.002 |
| E10    | 0.068 ± 0.012 | 0.073 ± 0.002 | 0.110 ± 0.006 |
| E11    | 0.023 ± 0.004 | 0.014 ± 0.000 | 0.007 ± 0.000 |

|     |               |               |               |
|-----|---------------|---------------|---------------|
| E12 | 0.080 ± 0.013 | 0.033 ± 0.002 | 0.012 ± 0.001 |
| F01 | 0.281 ± 0.072 | 0.153 ± 0.014 | 0.016 ± 0.001 |
| F02 | 0.736 ± 0.077 | 0.950 ± 0.044 | 0.063 ± 0.006 |
| F03 | 0.014 ± 0.002 | 0.007 ± 0.001 | 0.009 ± 0.001 |
| F04 | 0.015 ± 0.002 | 0.007 ± 0.000 | 0.008 ± 0.001 |
| F05 | 0.010 ± 0.001 | 0.004 ± 0.000 | 0.007 ± 0.000 |
| F06 | 0.064 ± 0.007 | 0.022 ± 0.001 | 0.054 ± 0.005 |
| F07 | 0.009 ± 0.001 | 0.003 ± 0.000 | 0.010 ± 0.002 |
| F08 | 0.017 ± 0.002 | 0.007 ± 0.001 | 0.009 ± 0.000 |
| F09 | 0.059 ± 0.003 | 0.021 ± 0.001 | 0.028 ± 0.003 |
| F10 | 0.009 ± 0.001 | 0.004 ± 0.000 | 0.007 ± 0.000 |
| F11 | 0.054 ± 0.010 | 0.026 ± 0.001 | 0.030 ± 0.002 |
| F12 | 0.007 ± 0.001 | 0.005 ± 0.002 | 0.011 ± 0.002 |
| G01 | 0.149 ± 0.026 | 0.081 ± 0.008 | 0.011 ± 0.000 |
| G02 | 0.028 ± 0.007 | 0.010 ± 0.001 | 0.006 ± 0.000 |
| G03 | 0.068 ± 0.007 | 0.026 ± 0.003 | 0.028 ± 0.003 |
| G04 | 0.029 ± 0.002 | 0.013 ± 0.001 | 0.018 ± 0.001 |
| G05 | 0.020 ± 0.001 | 0.007 ± 0.000 | 0.008 ± 0.001 |
| G06 | 0.060 ± 0.001 | 0.027 ± 0.003 | 0.029 ± 0.001 |
| G07 | 0.012 ± 0.001 | 0.005 ± 0.000 | 0.007 ± 0.000 |
| G08 | 0.025 ± 0.002 | 0.011 ± 0.000 | 0.014 ± 0.001 |
| G09 | 0.017 ± 0.002 | 0.006 ± 0.001 | 0.010 ± 0.000 |
| G10 | 0.009 ± 0.001 | 0.004 ± 0.000 | 0.007 ± 0.000 |
| G11 | 0.006 ± 0.000 | 0.003 ± 0.000 | 0.005 ± 0.000 |
| G12 | 0.010 ± 0.002 | 0.004 ± 0.001 | 0.006 ± 0.000 |
| H01 | 0.023 ± 0.002 | 0.025 ± 0.001 | 0.006 ± 0.000 |
| H02 | 0.239 ± 0.017 | 0.422 ± 0.018 | 0.024 ± 0.000 |
| H03 | 0.176 ± 0.019 | 0.033 ± 0.001 | 0.125 ± 0.010 |
| H04 | 0.211 ± 0.004 | 0.035 ± 0.003 | 0.169 ± 0.011 |
| H05 | 0.015 ± 0.000 | 0.018 ± 0.002 | 0.035 ± 0.001 |
| H06 | 0.018 ± 0.001 | 0.021 ± 0.002 | 0.046 ± 0.003 |
| H07 | 0.006 ± 0.000 | 0.002 ± 0.000 | 0.005 ± 0.000 |
| H08 | 0.004 ± 0.000 | 0.002 ± 0.000 | 0.004 ± 0.000 |
| H09 | 0.006 ± 0.000 | 0.002 ± 0.000 | 0.005 ± 0.000 |
| H10 | 0.003 ± 0.000 | 0.002 ± 0.000 | 0.004 ± 0.000 |
| H11 | 0.003 ± 0.000 | 0.002 ± 0.000 | 0.005 ± 0.000 |
| H12 | 0.004 ± 0.000 | 0.002 ± 0.000 | 0.004 ± 0.001 |
